# Supplementary material for: Antibiotics that target mitochondria extend lifespan in C. elegans
Source: publisher site journal article supplement (doi:10.18632/aging.205229), 2023-11-09
Supplement: Supplementary file [file aging-v15i21-205229-supplementary-material-SD1.pdf]

## SUPPLEMENTARY FIGURES

### Doxycycline decreases Lipofuscin content

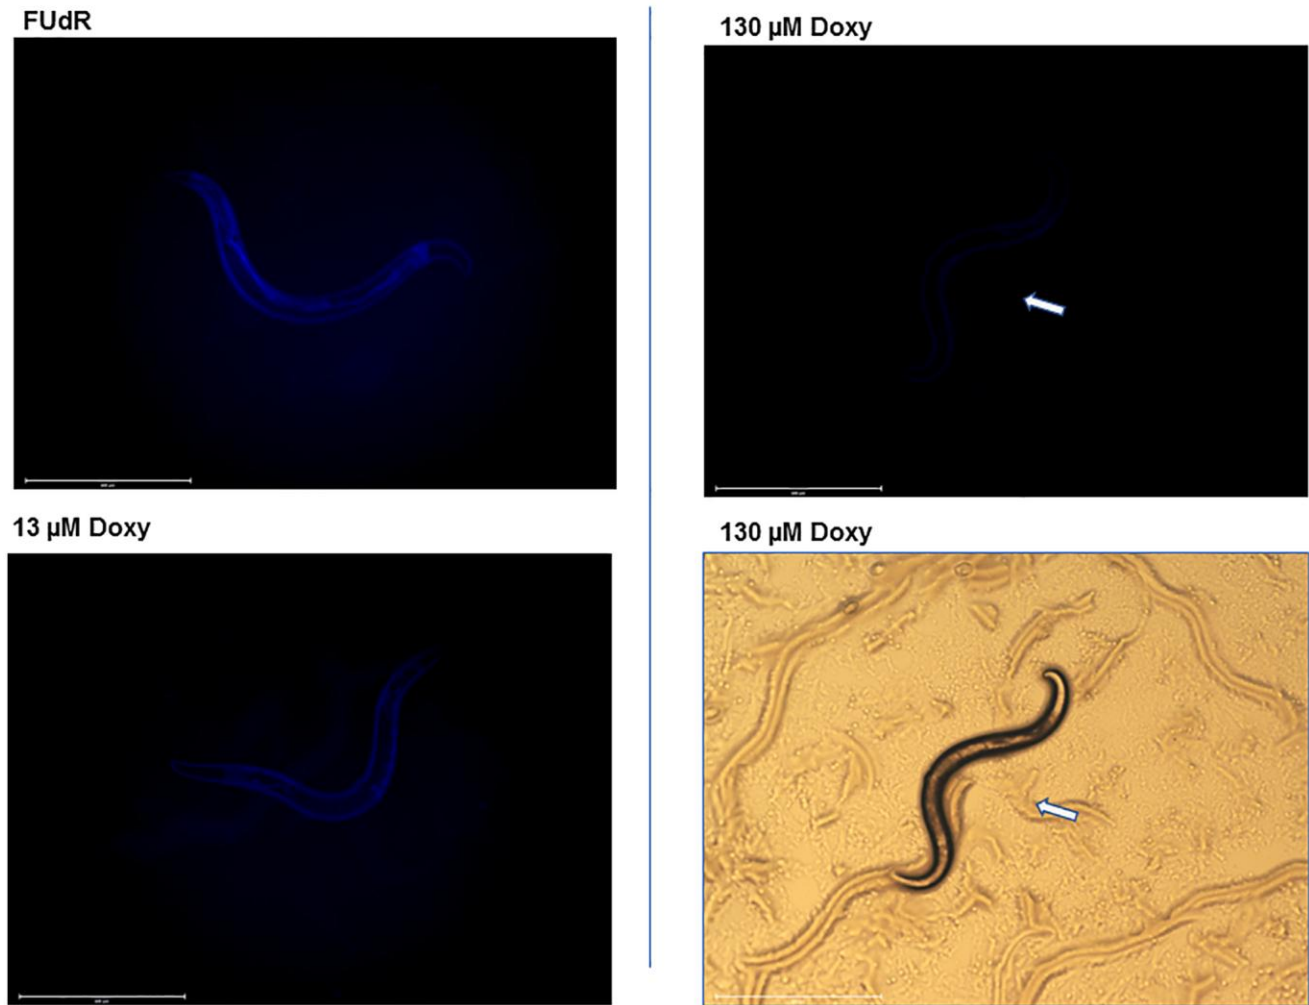

**Supplementary Figure 1. Doxycycline decreases lipofuscin content in adults (13 days from young adult stage).** A representative image of lipofuscin content evaluated by autofluorescence. DAPI filter set was used. Left half of the figure: top panel, FUdR control; lower panel, treatment with doxycycline at the concentration of 13  $\mu\text{M}$ . Right half of the figure: top panel, treatment with doxycycline at the concentration of 130  $\mu\text{M}$ ; lower photograph as the one above but in brightfield. The arrow indicates the worm. Magnification 10X. Scale bar: 500  $\mu\text{m}$ .

## Azithromycin decreases Lipofuscin content

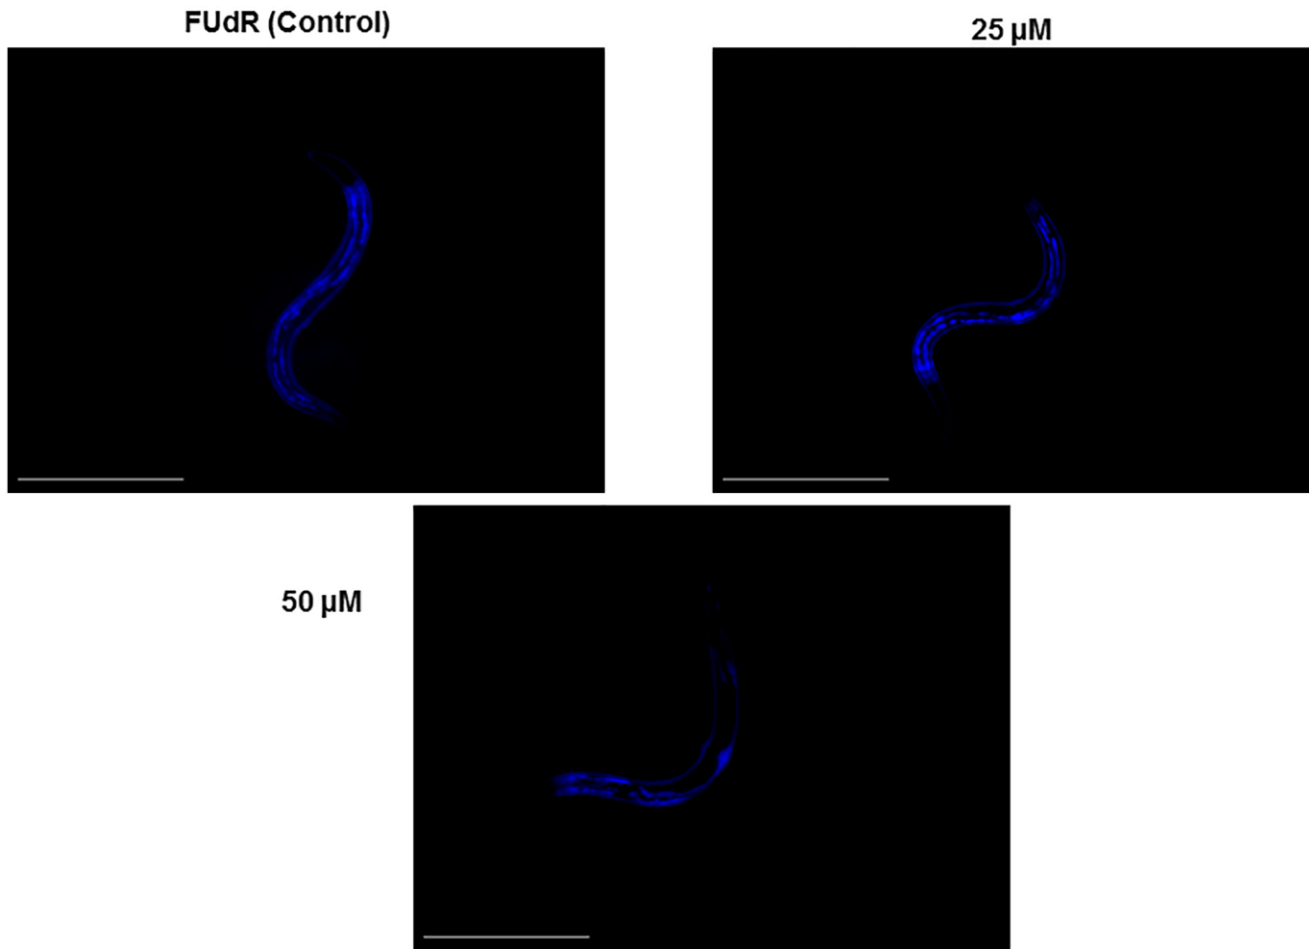

**Supplementary Figure 2. Azithromycin decreases lipofuscin content in adults (13 days from young adult stage).** Representative image of lipofuscin content evaluated by autofluorescence of the above pigment. DAPI filter set was used. Clockwise: FUdR control; *C. elegans* treated with azithromycin at the concentration of 25  $\mu\text{M}$ ; *C. elegans* treated with azithromycin at the concentration of 50  $\mu\text{M}$ . Magnification 10X. Scale bar: 500  $\mu\text{m}$ .

## DPI Decreases Lipofuscin content

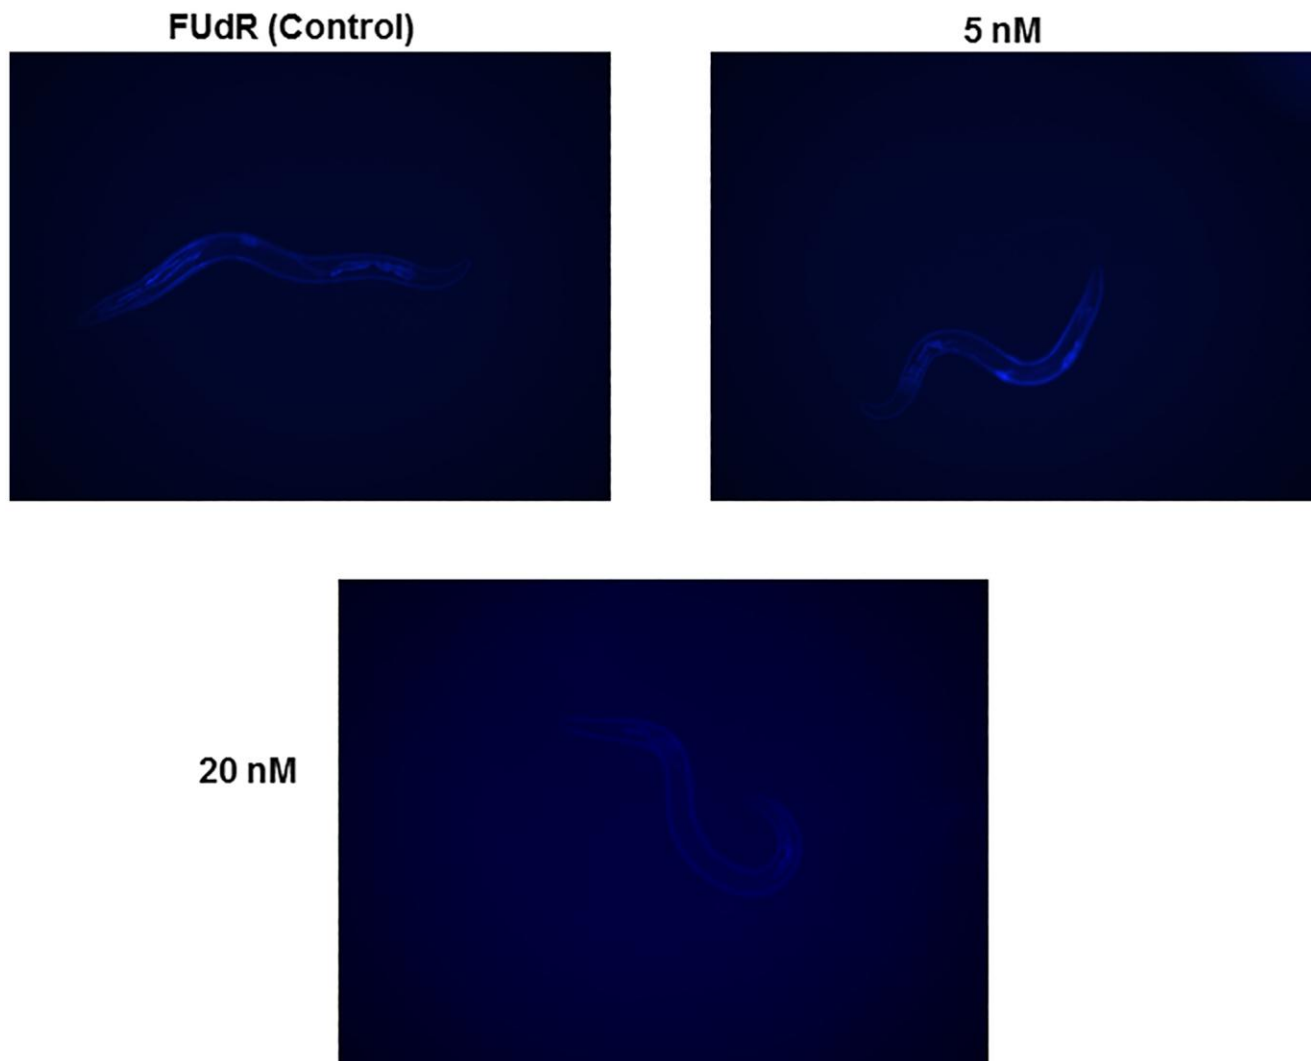

**Supplementary Figure 3. DPI decreases lipofuscin content in adults (13 days from young adult stage).** Representative image of lipofuscin content evaluated by autofluorescence of the above pigment. DAPI filter set was used. Clockwise: FUdR control; *C. elegans* treated with DPI at the concentration of 5 nM; *C. elegans* treated with DPI at the concentration of 20 nM. Magnification 10X. Scale bar: 500  $\mu$ m.

**A Dual Combo and Triple Combo Decrease Lipofuscin Content**

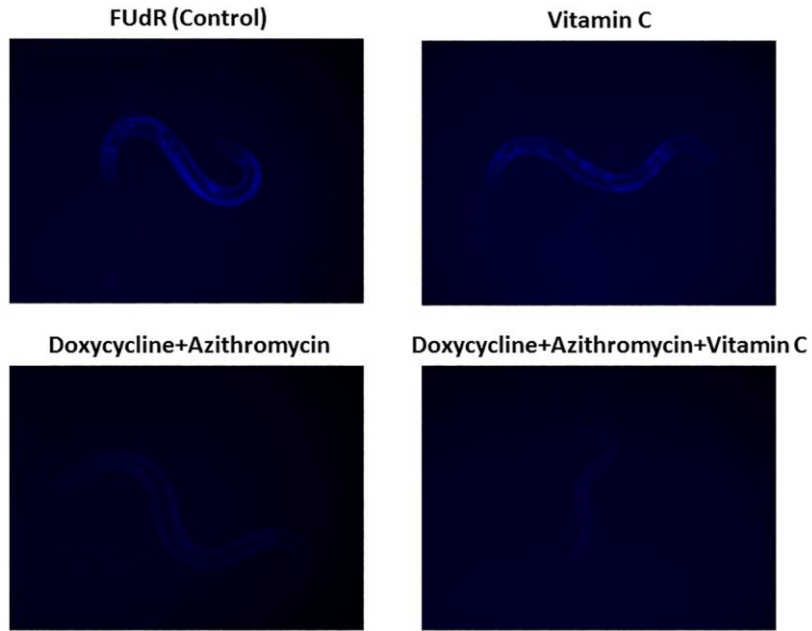

**B Dual Combo and Triple Combo Decrease Lipofuscin Content**

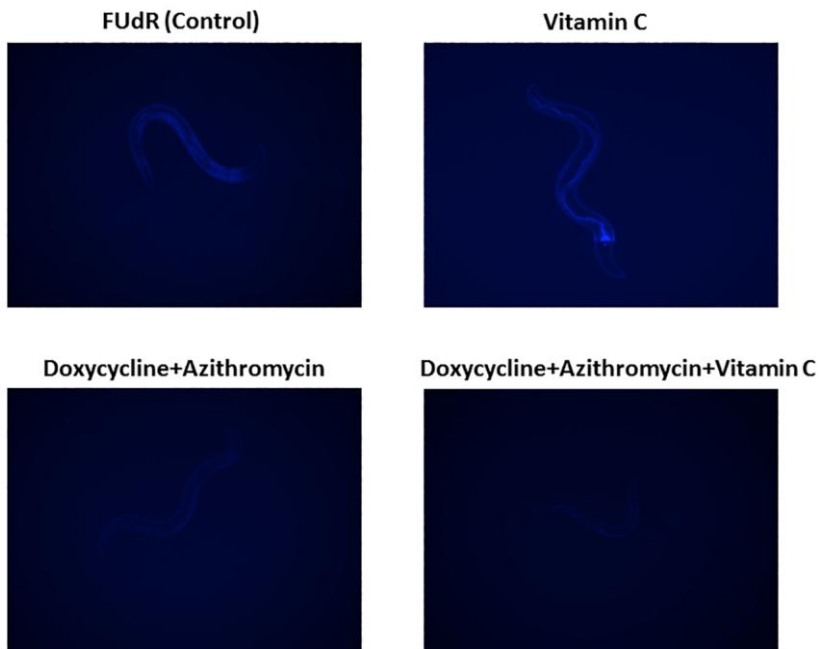

**Supplementary Figure 4. Doxycycline/Azithromycin combination decreases lipofuscin content in adults.** Representative images of lipofuscin content evaluated by autofluorescence of the above pigment. DAPI filter was used. (A) Evaluation at 8 days from young adult stage. (B) evaluation at 13 days from young adult stage. Clockwise: untreated control; *C. elegans* treated with vitamin C alone; *C. elegans* treated with doxycycline plus azithromycin plus vitamin C; *C. elegans* treated with doxycycline plus azithromycin. Magnification 10X. Scale bar: 500  $\mu$ m.
